# Supplementary material
Source: PubMed Central journal article supplement (PMC2720933)
Supplement: supp_122_7_1035__1.pdf [file supp_122_7_1035__1.pdf]

| <b>Plasmid</b>     | <b>cDNA</b> | <b>Source</b>   | <b>MTID</b> |
|--------------------|-------------|-----------------|-------------|
| pDONR 201          |             | Invitrogen      | 3960        |
| pDONR 223          |             | Invitrogen      | 4124        |
| pDONR 201          | Csn1        | This Study      | 4128        |
| pDONR 223          | Csn3        | Open Biosystems | 4129        |
| pDONR 223          | Csn4        | Open Biosystems | 4130        |
| pDONR 201          | Csn5        | This Study      | 4131        |
| pDONR 201          | Csn6        | This Study      | 4132        |
| pDONR 201          | Csn7a       | This Study      | 4133        |
| pDONR 223          | Cdt2        | Open Biosystems | 4137        |
| pDONR 223          | Dda1        | Open Biosystems | 4138        |
| pDONR223           | Lrrc14      | Open Biosystems | 4139        |
| pDONR223           | Lrr1        | Open Biosystems | 4380        |
| pDEST (FLAG)3X     | empty       | This Study      | 3989        |
| pDEST (FLAG)3X     | Csn1        | This Study      | 4140        |
| pDEST (FLAG)3X     | Csn2        | This Study      | 4141        |
| pDEST (FLAG)3X     | Csn3        | This Study      | 4142        |
| pDEST (FLAG)3X     | Csn4        | This Study      | 4143        |
| pDEST (FLAG)3X     | Csn5        | This Study      | 4144        |
| pDEST (FLAG)3X     | Csn6        | This Study      | 4145        |
| pDEST (FLAG)3X     | Csn7a       | This Study      | 4146        |
| pDEST (FLAG)3X     | Cdt2        | This Study      | 4147        |
| pDEST (FLAG)3X     | Dda1        | This Study      | 4148        |
| pDEST (FLAG)3X     | Lrrc14      | This Study      | 4149        |
| pDEST (FLAG)3X     | Lrr1        | This Study      | 4381        |
| pDEST CMV (FLAG)3X | empty       | This Study      | 4149        |
| pDEST CMV (FLAG)3X | Dda1 FL     | This Study      | 4237        |
| pDEST CMV (FLAG)3X | Dda1 DC17   | This Study      | 4238        |
| pDEST CMV (FLAG)3X | Dda1 DC29   | This Study      | 4239        |
| pDEST CMV (FLAG)3X | Dda1 DN26   | This Study      | 4240        |
| pcDNA3             | H326        | This Study      | pMO134      |
| pcDNA3             | Ddb2        | This Study      | pMO126      |
| pcDNA3             | WDR23       | This Study      | pMO113      |
