# Supplementary material
Source: PubMed Central journal article supplement (PMC2720933)
Supplement: supp_122_7_1035__2.pdf [file supp_122_7_1035__2.pdf]

Targeted gene

Negative control

Cul4a

Cul4b

Ddb1

Dda1 (Qiagen Smartpool L-014277-01-0005)

Wdr23

Sequence

UUCUCCGAACGUGUCACGUTT

GAAUCCUACUGCUGAUCGATT

AGAUAAAGGUUGACCAUAUATT

AGAUCGCGAUAAUAAAGAATT

CCUCAUAGGAGCCGAUGUATT

CAAACAUCCUCCUGCGCUATT

GCGAGUACCCGUCUGAACATT

CUGUAUCAAGCGUUGGUUATT

AUAUGGCCGUAUCCGUAATT
