# Supplementary material
Source: PubMed Central journal article supplement (PMC2720933)
Supplement: supp_122_7_1035__3.pdf [file supp_122_7_1035__3.pdf]

| Protein name | Accession numbers | Protein molecular weight (AMU) | Csn1                  |                        | Csn3                  |                        | Csn4                  |                        | Csn5                  |                        | Csn6                  |                        | Csn7a                 |                        |
|--------------|-------------------|--------------------------------|-----------------------|------------------------|-----------------------|------------------------|-----------------------|------------------------|-----------------------|------------------------|-----------------------|------------------------|-----------------------|------------------------|
|              |                   |                                | Nb of unique peptides | % of sequence coverage | Nb of unique peptides | % of sequence coverage | Nb of unique peptides | % of sequence coverage | Nb of unique peptides | % of sequence coverage | Nb of unique peptides | % of sequence coverage | Nb of unique peptides | % of sequence coverage |
| Csn1         | IPI00414289       | 59034,1                        | 26                    | 49,7                   | 26                    | 60,9                   | 22                    | 42,9                   | 11                    | 28,7                   | 27                    | 62,8                   | 13                    | 29,6                   |
| Csn2         | IPI00743825       | 51581,7                        | 15                    | 32,7                   | 29                    | 63,9                   | 19                    | 41,8                   | 16                    | 49,7                   | 23                    | 57,1                   | 12                    | 31,2                   |
| Csn3         | IPI00025721       | 47725,3                        | 15                    | 46,9                   | 20                    | 64                     | 21                    | 59,7                   | 15                    | 47,2                   | 20                    | 60,9                   | 12                    | 41,9                   |
| Csn4         | IPI00171844       | 46252,2                        | 26                    | 84,5                   | 30                    | 87,2                   | 31                    | 82,3                   | 19                    | 66,3                   | 28                    | 87,1                   | 19                    | 61,8                   |
| Csn5         | IPI00009958       | 37430,7                        | 14                    | 47,1                   | 17                    | 62,5                   | 17                    | 56,5                   | 15                    | 58,6                   | 21                    | 66,4                   | 13                    | 44,7                   |
| Csn6         | IPI00163230       | 36145,4                        | 13                    | 55,4                   | 16                    | 57,8                   | 16                    | 56,3                   | 9                     | 45,6                   | 16                    | 61,2                   | 12                    | 48,9                   |
| Csn7a        | IPI00301419       | 30258,8                        | 12                    | 51,3                   | 16                    | 67,3                   | 17                    | 69,1                   | 11                    | 45,6                   | 16                    | 67,3                   | 10                    | 49,1                   |
| Csn7b        | IPI00009301       | 29604,6                        | 8                     | 31,1                   | 13                    | 58,3                   | 14                    | 61                     | 5                     | 30,7                   | 13                    | 51,1                   |                       |                        |
| Csn8         | IPI00009480       | 23208,1                        | 9                     | 72,7                   | 10                    | 87,1                   | 12                    | 78                     | 7                     | 67,5                   | 9                     | 65,5                   | 6                     | 63,2                   |
| Rbx1         | IPI00003386       | 12255,4                        | 2                     | 17,6                   | 3                     | 30,6                   | 3                     | 30,6                   | 2                     | 17,6                   | 2                     | 17,6                   | 2                     | 17,6                   |
| Cul1         | IPI00014310       | 89663,4                        | 4                     | 6,06                   | 13                    | 57,8                   | 7                     | 10,4                   |                       |                        | 8                     | 14,1                   |                       |                        |
| Skp1         | IPI00301364       | 18640,3                        | 1                     | 18                     | 3                     | 36,2                   | 1                     | 18                     |                       |                        | 2                     | 25,2                   |                       |                        |
| Fbx17        | 061460,IPI0038    | 31460,3                        |                       |                        | 6                     | 36,7                   | 1                     | 5                      |                       |                        |                       |                        |                       |                        |
| Cul2         | IPI00014311       | 86967,4                        | 2                     | 2,95                   | 14                    | 24,3                   | 6                     | 12,1                   | 1                     | 3                      | 14                    | 22,3                   | 2                     | 2,82                   |
| Cul5         | IPI00216003       | 90941,2                        |                       |                        | 2                     | 2,95                   |                       |                        |                       |                        | 3                     | 4,1                    |                       |                        |
| ElonginC     | IPI00300341       | 12455,4                        |                       |                        | 2                     | 30,4                   | 3                     | 29,5                   |                       |                        | 3                     | 35,7                   |                       |                        |
| ElonginB     | IPI00026670       | 13115,2                        | 1                     | 13                     | 2                     | 40,7                   | 4                     | 68,8                   |                       |                        | 2                     | 31,4                   |                       |                        |
| Fem1         | IPI00033419       | 70264                          |                       |                        |                       |                        | 1                     | 1,8                    |                       |                        |                       |                        |                       |                        |
| Lrr1         | IPI00743306       | 51516,8                        | 2                     | 5,84                   | 5                     | 15,5                   | 3                     | 10,1                   |                       |                        |                       |                        |                       |                        |
| Lrrc14       | IPI00014239       | 54496,7                        |                       |                        | 3                     | 6,29                   | 3                     | 11                     |                       |                        | 7                     | 25,2                   |                       |                        |
| Cul3         | IPI00014312       | 88914,1                        | 11                    | 19,7                   | 25                    | 37,4                   | 21                    | 34                     | 8                     | 13,9                   | 5                     | 8,98                   | 1                     | 1                      |
| Btbd1        | IPI00033866       | 52754,7                        |                       |                        | 2                     | 7,05                   | 3                     | 12,5                   | 3                     | 1,6                    |                       |                        |                       |                        |
| Btbd2        | IPI00022826       | 55913,3                        | 1                     | 2                      | 3                     | 5,71                   | 6                     | 11,4                   |                       |                        |                       |                        |                       |                        |
| Klhdc5       | IPI00220056       | 56850,5                        | 3                     | 7,41                   | 8                     | 27,5                   | 7                     | 20,8                   |                       |                        |                       |                        |                       |                        |
| Klhl18       | IPI00747824       | 56338,3                        |                       |                        | 1                     | 3                      | 3                     | 8,25                   |                       |                        |                       |                        |                       |                        |
| Cul4A        | IPI00419273       | 88220,4                        | 10                    | 16,5                   | 6                     | 19,8                   | 19                    | 24,9                   | 3                     | 7,47                   | 9                     | 23,9                   | 4                     | 10,2                   |
| Cul4B        | IPI00643885       | 102742                         | 5                     | 15,6                   | 25                    | 33,8                   | 17                    | 34                     | 11                    | 18                     | 28                    | 37,9                   | 10                    | 14,9                   |
| DDB1         | IPI00293464       | 126952                         | 21                    | 24,9                   | 44                    | 49,1                   | 33                    | 36,1                   | 21                    | 27                     | 46                    | 58,4                   | 15                    | 20,2                   |
| DDB2         | IPI00021518       | 47847                          | 1                     | 4                      | 6                     | 19                     | 4                     | 14,5                   |                       |                        | 4                     | 15,2                   |                       |                        |
| CSA/Ercc8    | IPI00012284       | 44036,8                        | 1                     | 4                      | 1                     | 4                      | 1                     | 2                      |                       |                        | 2                     | 9,6                    |                       |                        |
| VPRBP        | IPI00329528       | 168922                         | 3                     | 3,19                   | 5                     | 3,25                   | 16                    | 14,7                   | 1                     | 1                      | 9                     | 9,03                   | 1                     | 2                      |
| WDR23        | IPI00178972       | 61652,5                        | 5                     | 14,8                   | 7                     | 20,2                   | 13                    | 35,2                   | 1                     | 3                      | 14                    | 29,9                   | 5                     | 18,1                   |
| WDR32        | IPI00410264       | 60564,9                        |                       |                        |                       |                        |                       |                        |                       |                        | 6                     | 12,5                   |                       |                        |
| Cdt2         | IPI00643808       | 79450,2                        |                       |                        | 1                     | 2                      | 2                     | 3,43                   | 2                     | 6,44                   | 2                     | 3,7                    |                       |                        |
| H326         | IPI00290071       | 66833,4                        |                       |                        |                       |                        |                       |                        |                       |                        | 5                     | 11,9                   |                       |                        |
| Dda1         | IPI00031563       | 11817,4                        |                       |                        | 1                     | 12                     | 2                     | 23,5                   |                       |                        | 2                     | 20,6                   |                       |                        |
| Dcaf16       | IPI00015609       | 24175,8                        |                       |                        |                       |                        |                       |                        |                       |                        | 2                     | 13,4                   |                       |                        |
| Dcaf17       | IPI00017389       | 58761                          |                       |                        |                       |                        |                       |                        |                       |                        | 2                     | 3,27                   |                       |                        |
| Crbn         | IPI00045917       | 50528,6                        |                       |                        | 2                     | 6                      | 2                     | 10                     |                       |                        | 3                     | 13,1                   |                       |                        |
| Ifrg15       | IPI00007096       | 15329,8                        |                       |                        | 1                     | 11                     | 2                     | 25,2                   |                       |                        | 2                     | 25,2                   |                       |                        |
