# Supplementary material
Source: PubMed Central journal article supplement (PMC2720933)
Supplement: supp_122_7_1035__4.pdf [file supp_122_7_1035__4.pdf]

| Gene name | IPI         | unique pept | % coverage |
|-----------|-------------|-------------|------------|
| Lrr1      | IPI00743306 | 29          | 21         |
| Csn1      | IPI00156282 | 22          | 19         |
| Csn2      | IPI00743825 | 25          | 17         |
| Csn3      | IPI00025721 | 16          | 14         |
| Csn4      | IPI00171844 | 29          | 21         |
| Csn5      | IPI00009958 | 10          | 8          |
| Csn6      | IPI00163230 | 17          | 13         |
| Csn7a     | IPI00301419 | 14          | 11         |
| Csn7b     | IPI00009301 | 8           | 6          |
| Csn8      | IPI00009480 | 7           | 5          |
| Rbx1      | IPI00003386 | 6           | 5          |
| Cul2      | IPI00014311 | 48          | 38         |
| ElonginC  | IPI00300341 | 5           | 4          |
| ElonginB  | IPI00026670 | 5           | 4          |

| Gene name | IPI         | unique pept | % coverage |
|-----------|-------------|-------------|------------|
| Lrrc14    | IPI00743306 | 18          | 54         |
| Csn3      | IPI00025721 | 2           | 44         |
| Rbx1      | IPI00003386 | 2           | 33         |
| Cul2      | IPI00014311 | 9           | 55         |
| ElonginC  | IPI00300341 | 6           | 42         |
| ElonginB  | IPI00026670 | 3           | 70         |
