# Supplementary material
Source: PubMed Central journal article supplement (PMC2720933)
Supplement: supp_122_7_1035__5.pdf [file supp_122_7_1035__5.pdf]

| Protein name                        | Accession numbers | Protein molecular weight (AMU) | Cul3 IP               |                        | Cul4A IP              |                        |
|-------------------------------------|-------------------|--------------------------------|-----------------------|------------------------|-----------------------|------------------------|
|                                     |                   |                                | Nb of unique peptides | % of sequence coverage | Nb of unique peptides | % of sequence coverage |
| COP9 signalosome                    | CSN1_HUMAN        | 53355,8                        | 4                     | 9,3                    | 13                    | 33                     |
| COP9 signalosome                    | CSN2_HUMAN        | 51581,7                        | 9                     | 23,0                   | 12                    | 32                     |
| COP9 signalosome                    | CSN3_HUMAN        | 47725,3                        | 7                     | 19,0                   | 7                     | 23                     |
| COP9 signalosome                    | CSN4_HUMAN        | 46252,2                        | 13                    | 32,0                   | 18                    | 54                     |
| COP9 signalosome                    | CSN5_HUMAN        | 37430,7                        | 6                     | 17,0                   | 12                    | 41                     |
| COP9 signalosome                    | CSN6_HUMAN        | 36145,4                        | 4                     | 13,0                   | 8                     | 32                     |
| COP9 signalosome                    | CSN7A_HUMAN       | 30258,8                        | 4                     | 16,0                   | 11                    | 50                     |
| COP9 signalosome                    | CSN7B_HUMAN       | 29604,6                        |                       |                        | 6                     | 28                     |
| COP9 signalosome                    | CSN8_HUMAN        | 23208,1                        |                       |                        | 4                     | 26                     |
| Cullin-3 (CUL-3)                    | CUL3_HUMAN        | 88914,1                        | 34                    | 47,0                   |                       |                        |
| Kelch-like protein                  | KLH13_HUMAN       | 68170,2                        | 11                    | 19,0                   |                       |                        |
| Kelch-like protein                  | KLH22_HUMAN       | 71648,8                        | 4                     | 5,5                    |                       |                        |
| Kelch-like protein                  | KLHL9_HUMAN       | 69411,4                        | 5                     | 20,0                   |                       |                        |
| Kelch domain-containing protein     | KLDC5_HUMAN       | 56850,5                        | 12                    | 28,0                   |                       |                        |
| Kelch repeat and Kelch-like protein | KBTB6_HUMAN       | 76121                          | 4                     | 5,6                    |                       |                        |
| KLHL18                              | Q0JS72_HUMAN      | 63619,6                        | 4                     | 7,0                    |                       |                        |
| BTB/POZ domain-containing protein   | KCD10_HUMAN       | 35415,1                        | 6                     | 21,0                   |                       |                        |
| BTB/POZ domain-containing protein   | BTBD1_HUMAN       | 52754,7                        | 6                     | 14,0                   |                       |                        |
| BTB/POZ domain-containing protein   | BTBD2_HUMAN       | 55913,3                        | 4                     | 14,0                   |                       |                        |
| Ubiquitin                           | UBIQ_HUMAN        | 14710,9                        | 4                     | 31,0                   | 3                     | 27                     |
| NEDD8 precursor                     | NEDD8_HUMAN       | 9054                           |                       |                        | 3                     | 35                     |
| RING-box protein                    | RBX1_HUMAN        | 12255,4                        |                       |                        | 3                     | 23                     |
| Cullin-4A (CUL-4A)                  | CUL4A_HUMAN       | 87665,7                        |                       |                        | 47                    | 53                     |
| DNA damage-binding protein          | DDB1_HUMAN        | 126952,2                       |                       |                        | 43                    | 39                     |
| DNA damage-binding protein          | DDB2_HUMAN        | 47847                          |                       |                        | 12                    | 36                     |
| IQWD1                               | Q58WW2_HUMAN      | 96293,1                        |                       |                        | 2                     | 1,76                   |
| VPRBP protein                       | Q2YD74_HUMAN      | 168922,1                       |                       |                        | 40                    | 30                     |
| AMBRA1                              | Q86XD6_HUMAN      | 132807,3                       |                       |                        | 11                    | 12                     |
| WDR23 protein                       | WDR23_HUMAN       | 61633,4                        |                       |                        | 10                    | 25                     |
| H326 protein                        | Q12839_HUMAN      | 66365,7                        |                       |                        | 6                     | 12                     |
| PWP1                                | PWP1_HUMAN        | 55810,6                        |                       |                        | 5                     | 13                     |
| PHIP                                | Q5VVH4_HUMAN      | 206674,2                       |                       |                        | 2                     | 0,9                    |
| DDA1                                | Q9BW61_HUMAN      | 11817,4                        |                       |                        | 4                     | 38                     |
| Dcaf15                              | Q66K64_HUMAN      | 66445,6                        |                       |                        | 4                     | 6,2                    |
| Dcaf16                              | Q9NXF7_HUMAN      | 24175,8                        |                       |                        | 3                     | 16                     |
| Cullin-associated protein           | CAND1_HUMAN       | 136363,1                       |                       |                        | 39                    | 38                     |
