# Supplementary material
Source: PubMed Central journal article supplement (PMC2720933)
Supplement: supp_122_7_1035__6.pdf [file supp_122_7_1035__6.pdf]

| Protein name   | Accession numbers  | Protein molecular weight (AMU) | FLAG-Dda              |                        | LAG-Dda/MG13          |                        |
|----------------|--------------------|--------------------------------|-----------------------|------------------------|-----------------------|------------------------|
|                |                    |                                | Nb of unique peptides | % of sequence coverage | Nb of unique peptides | % of sequence coverage |
| Csn1-1         | IPI00414289        | 59034.1                        |                       |                        | 14                    | 48                     |
| Csn1-2         | IPI00156282        | 55520.2                        | 9                     | 25,3                   | 14                    | 51,5                   |
| Csn2-1         | IPI00743825        | 51581,7                        | 5                     | 18,1                   | 12                    | 51,5                   |
| Csn2-2         | IPI00018813        | 52722.0                        | 5                     | 17,7                   |                       |                        |
| Csn3           | IPI00025721        | 47725,3                        | 8                     | 26,1                   | 12                    | 43,8                   |
| Csn4           | IPI00171844        | 46252,2                        | 11                    | 49,8                   | 22                    | 81,5                   |
| Csn5           | IPI00009958        | 37430,7                        |                       |                        | 7                     | 36,9                   |
| Csn6           | IPI00163230        | 36145,4                        | 6                     | 25,1                   | 12                    | 53,5                   |
| Csn7a          | IPI00301419        | 30258,8                        | 5                     | 37,5                   | 9                     | 55,3                   |
| Csn7b          | IPI00009301        | 29604,6                        | 2                     | 16,3                   | 6                     | 45,1                   |
| Csn8           | IPI00009480        | 23208,1                        |                       |                        | 7                     | 82,3                   |
| Rbx1           | IPI00003386        | 12255.4                        | 2                     | 17,6                   | 2                     | 25                     |
| Cul4A          | IPI00419273        | 88220,4                        | 6                     | 25,2                   | 13                    | 32,4                   |
| Cul4B          | IPI00179057        | 102285.9                       | 23                    | 39,4                   | 25                    | 47,3                   |
| DDB1           | IPI00293464        | 126952,2                       | 61                    | 55,8                   | 72                    | 75,4                   |
| Vprbp          | IPI00329528        | 168922.1                       | 50                    | 46                     | 52                    | 51,6                   |
| Cop1           | IPI00171771        | 80457.3                        |                       |                        | 4                     | 9,44                   |
| Pwp1           | IPI00014298        | 55810.6                        |                       |                        | 7                     | 21,2                   |
| Wdr22          | IPI00746399        | 104163.7                       | 20                    | 30,3                   | 19                    | 37,4                   |
| Wdr40a         | IPI00411753        | 50499.8                        |                       |                        | 7                     | 25,2                   |
| Ercc8/Csa      | IPI00012284        | 44036.8                        | 7                     | 30,3                   | 9                     | 49                     |
| Wdtd1          | 00186384,IPI003982 | 75902.1                        | 4                     | 17,1                   | 11                    | 44,2                   |
| lqwd1          | IPI00157836        | 98406.3                        | 8                     | 17,3                   | 19                    | 31,9                   |
| Loc55626/Wdr94 | IPI00398257        | 132820.4                       | 47                    | 63                     | 35                    | 57,1                   |
| WDR23          | IPI00178972        | 61652.5                        | 9                     | 32,2                   | 16                    | 49,3                   |
| WDR32          | IPI00410264        | 60564.9                        | 8                     | 24,7                   | 16                    | 48,7                   |
| Cdt2           | IPI00643808        | 79450.2                        | 8                     | 23,3                   | 17                    | 42,6                   |
| H326           | IPI00290071        | 66833.4                        | 12                    | 30,5                   | 17                    | 49,1                   |
| Dda1           | IPI00031563        | 11817,4                        | 7                     | 86,3                   | 6                     | 58,8                   |
| Det1           | IPI00017502        | 65084.4                        | 5                     | 19,8                   | 6                     | 18,5                   |
| Dcaf15         | IPI00470781        | 66445.6                        | 10                    | 26,8                   | 12                    | 33                     |
| Dcaf16         | IPI00015609        | 24175,8                        | 3                     | 25                     | 7                     | 41,2                   |
| Dcaf17         | IPI00017389        | 58761                          | 2                     | 14,8                   | 6                     | 25,8                   |
| lfrg15         | IPI00007096        | 15329,8                        | 4                     | 38,9                   | 4                     | 48,9                   |
